# Supplementary material for: Pentagalloyl Glucose-Targeted Inhibition of P-Glycoprotein and Re-Sensitization of Multidrug-Resistant Leukemic Cells (K562/ADR) to Doxorubicin: In Silico and Functional Studies
Source: MDPI journal article supplement (doi:10.3390/ph16091192), 2023-08-22
Supplement: s1 [file s1]

## Supplementary Material

### **Pentagalloyl glucose targeted inhibition of P-glycoprotein and re-sensitization of multidrug-resistant leukemic cells (K562/ADR) to doxorubicin: in silico and functional studies**

**Nathupakorn Dechsupa<sup>1,2</sup>, Nopawit Khamto<sup>3,4</sup>, Pornthip Chawapun<sup>3,4,5</sup>, Sadanon Siriphong<sup>3,4,5</sup>, Phattarawadee Innuan<sup>1,2</sup>, Authaphinya Suwan<sup>1,2</sup>, Thitiworada Luangsuep<sup>2</sup>, Nichakorn Photilimthana<sup>2</sup>, Witchayaporn Maita<sup>2</sup>, Rossarin Thanacharttanatchaya<sup>2</sup>, Padchanee Sangthong<sup>3</sup>, Puttinan Meepowpan<sup>3,6,7</sup>, Chatchanok Udomtanakunchai<sup>2</sup>, Jiraporn Kantapan<sup>1,2\*</sup>**

<sup>1</sup>Molecular Imaging and Therapy Research Unit, Faculty of Associated Medical Sciences, Department Radiologic Technology, Chiang Mai University, Chiang Mai 50200, Thailand

<sup>2</sup>Faculty of Associated Medical Sciences, Department Radiologic Technology, Chiang Mai University, Chiang Mai 50200, Thailand

<sup>3</sup>Faculty of Science, Department of Chemistry, Chiang Mai University, Chiang Mai 50200, Thailand

<sup>4</sup>Graduate School, Chiang Mai University, Chiang Mai 50200, Thailand

<sup>5</sup>Interdisciplinary Program in Biotechnology, Graduate School, Chiang Mai University, Chiang Mai 50200, Thailand

<sup>6</sup>Center of Excellence in Materials Science and Technology, Chiang Mai University, Chiang Mai 50200, Thailand

<sup>7</sup>Center of Excellence for Innovation in Chemistry (PERCH-CIC), Faculty of Science, Chiang Mai University, Chiang Mai 50200, Thailand

**\*Correspondence:** Jiraporn Kantapan: jiraporn.kan@cmu.ac.th

**Supplementary Materials:** Figure S1: P-glycoprotein (P-gp) structure consists of two transmembrane domains, each including six helices that transverse the cellular membrane. In addition, it contains two ATP-binding regions (nucleotide-binding domains, NBDs) within the cell; Figure S2: Tariquidar superimposed between docked and co-crystallized ligands at the substrate binding site for docking protocol validation (PDB ID: 7A6E). The result showed the RMSD value of 1.465 Å; Figure S3: Superimposed between the docked and co-crystallized ATP at the ATP binding site for docking protocol validation (PDB ID: 6C0V). The result showed the RMSD value of 0.766 Å; Figure S4: 3-Dimensional structures of PGG, tariquidar, verapamil and ATP together with the best fit of these structures; Figure S5: 3D structures of protein-ligand complex and free energy landscape (FEL) of three replica copies of verapamil at substrate binding site of P-gp; Figure S6: 3D structures of protein-ligand complex and free energy landscape (FEL) of three replica copies of tariquidar at substrate binding site of P-gp; Figure S7: 3D structures of protein-ligand complex and free energy landscape (FEL) of three replica copies of PGG at substrate binding site of P-gp; Figure S8: 3D structures of protein-ligand complex and free energy landscape (FEL) of three replica copies of ATP at ATP binding site of P-gp; Figure S9: 3D structures of protein-ligand complex and free energy landscape (FEL) of three replica copies of PGG at ATP binding site of P-gp Figure S10: The uncropped western blot images corresponding to Figure 3a.

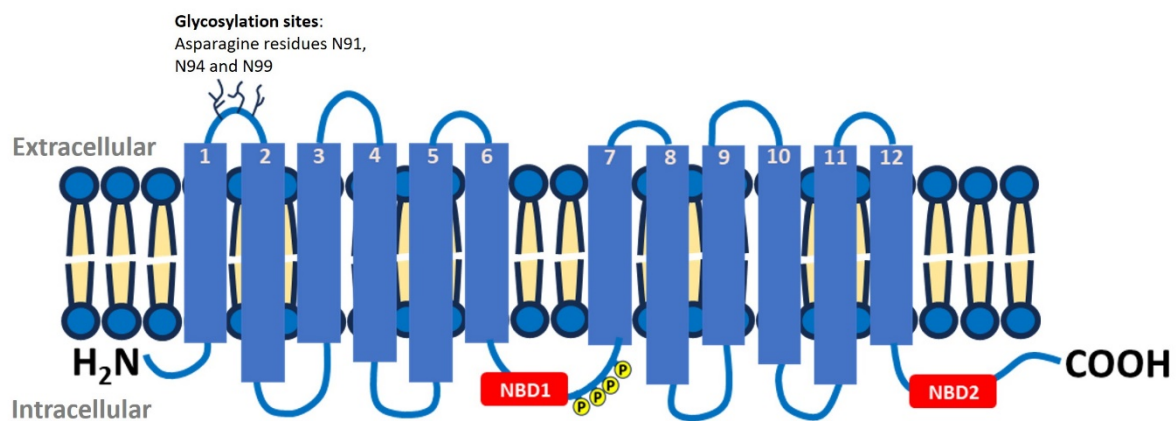

**Supplementary Figure S1.** P-glycoprotein (P-gp) structure consists of two transmembrane domains, each including six helices that transverse the cellular membrane. In addition, it contains two ATP-binding regions (nucleotide-binding domains, NBDs) within the cell

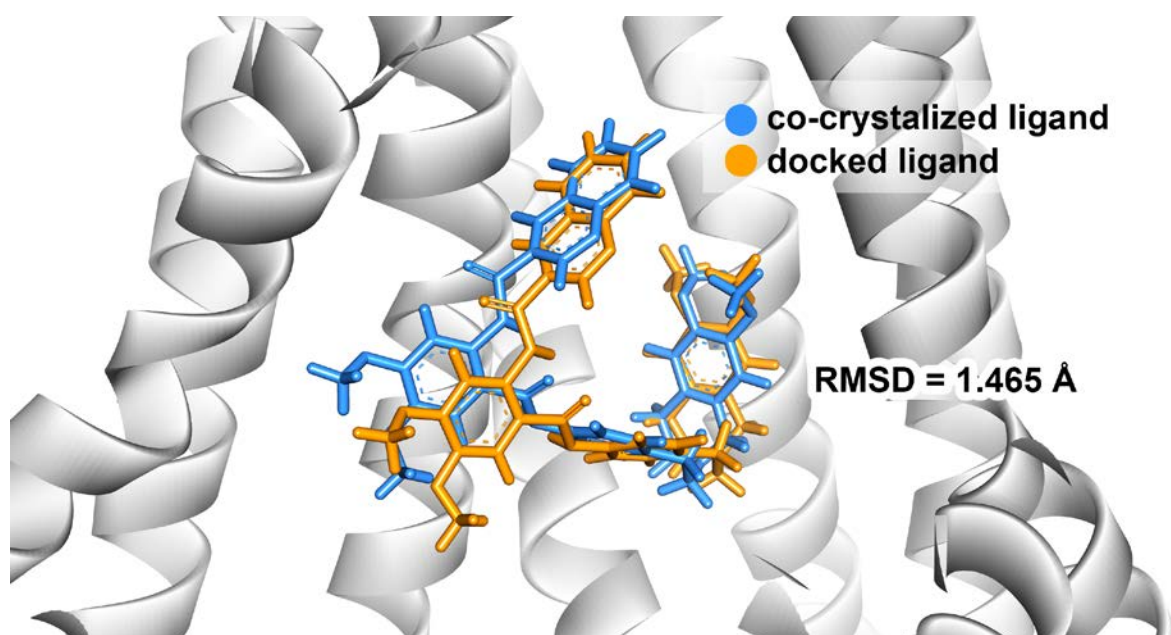

**Supplementary Figure S2.** Tariquidar superimposed between docked and co-crystallized ligands at the substrate binding site for docking protocol validation (PDB ID: 7A6E). The result showed the RMSD value of 1.465 Å.

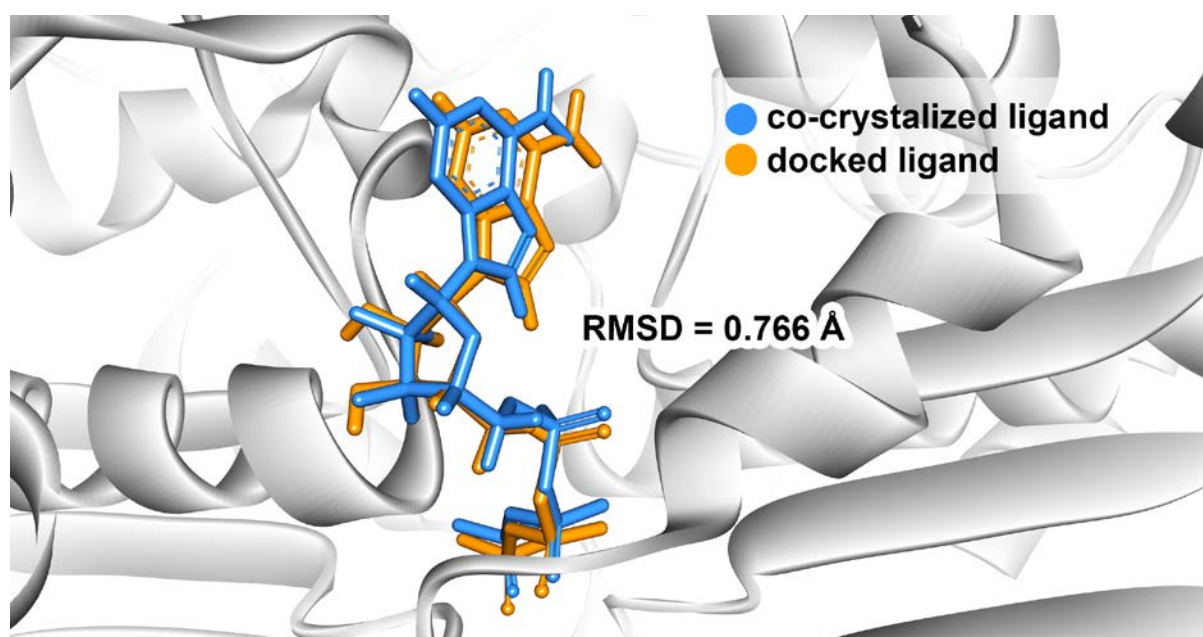

**Supplementary Figure S3.** Superimposed between the docked and co-crystallized ATP at the ATP binding site for docking protocol validation (PDB ID: 6C0V). The result showed the RMSD value of 0.766 Å.

### 3-Dimensional Structures of Ligands at the substrate binding site

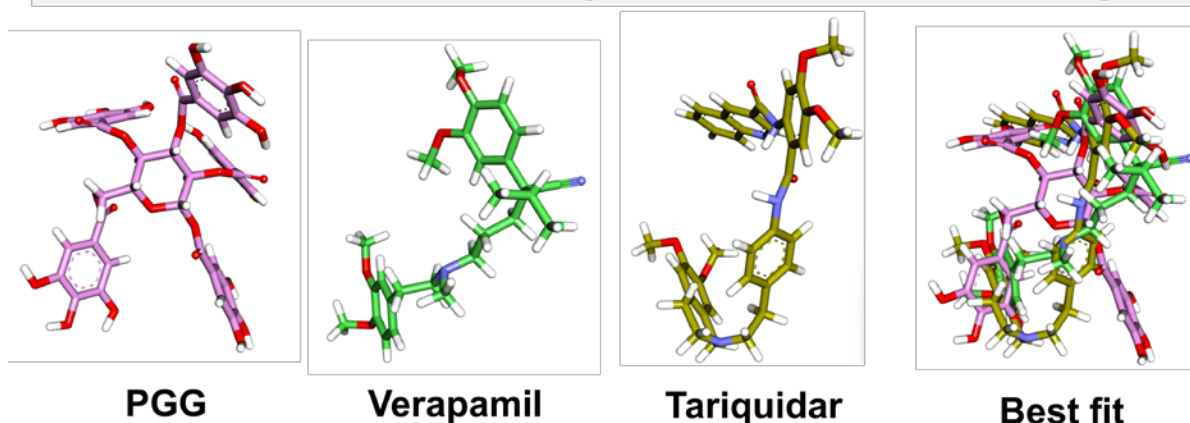

### 3-Dimensional Structures of Ligands at the ATP binding site

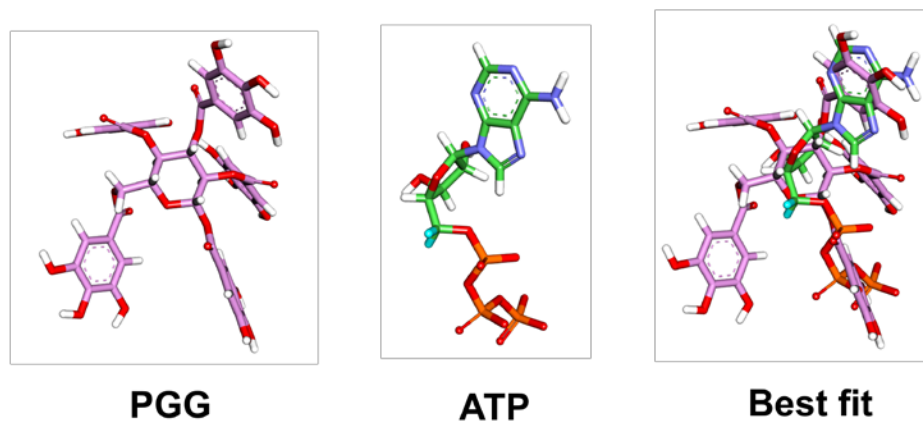

**Supplementary Figure S4.** 3-Dimensional structures of PGG, tariquidar, verapamil and ATP together with the best fit of these structures.



### Three replica copies of verapamil bound with P-gp at substrate binding site

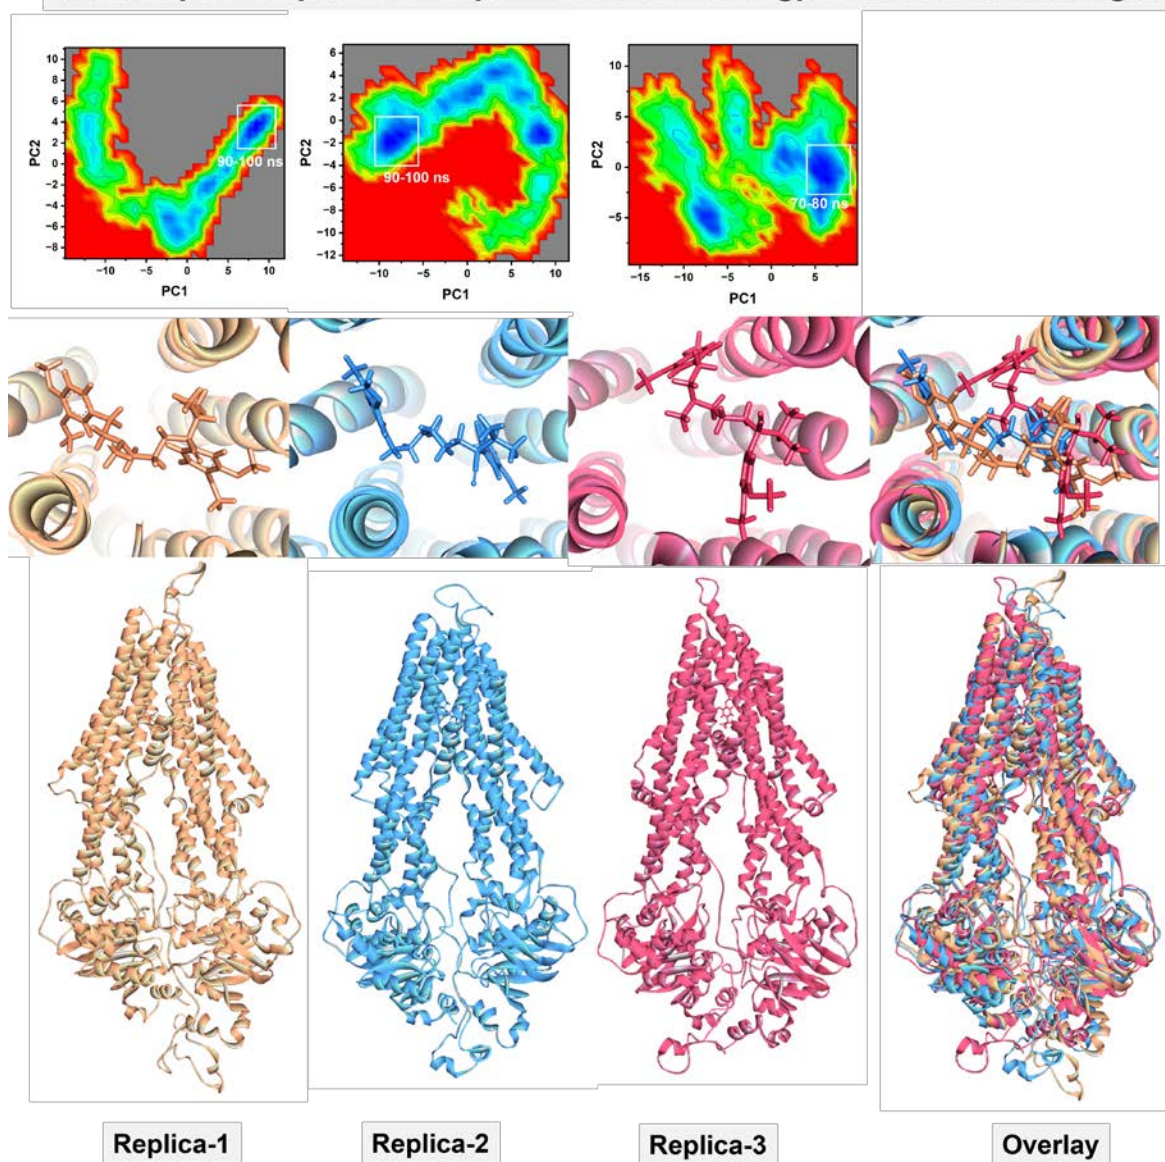

**Supplementary Figure S5.** 3D structures of protein-ligand complex and free energy landscape (FEL) of three replica copies of verapamil at substrate binding site of P-gp

### Three replica copies of tariquidar bound with P-gp at substrate binding site

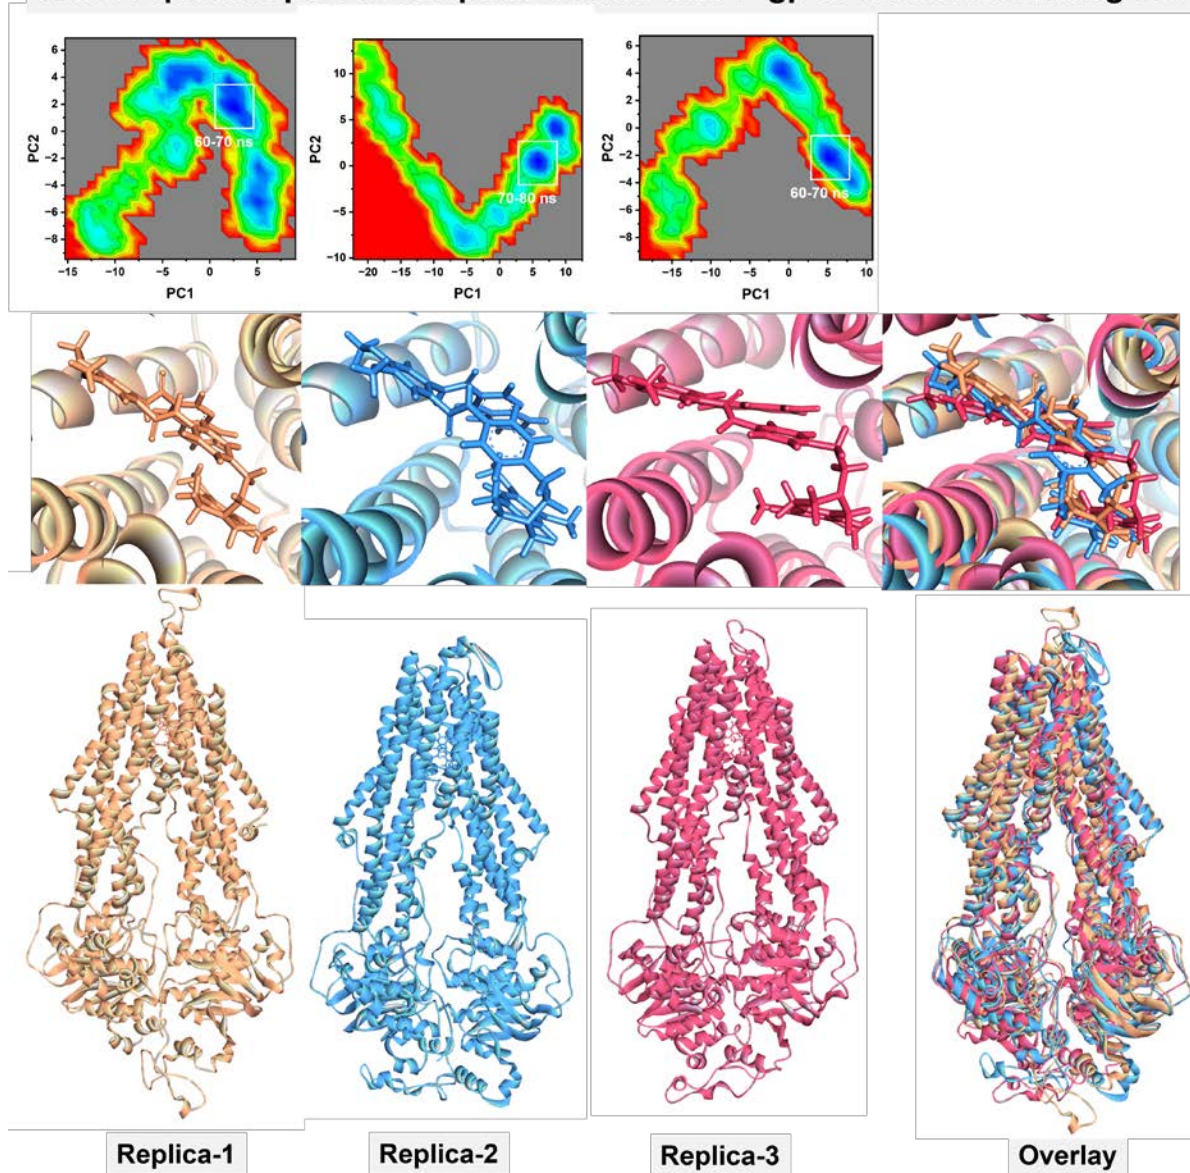

**Supplementary Figure S6.** 3D structures of protein-ligand complex and free energy landscape (FEL) of three replica copies of tariquidar at substrate binding site of P-gp



### Three replica copies of PGG bound with P-gp at substrate binding site

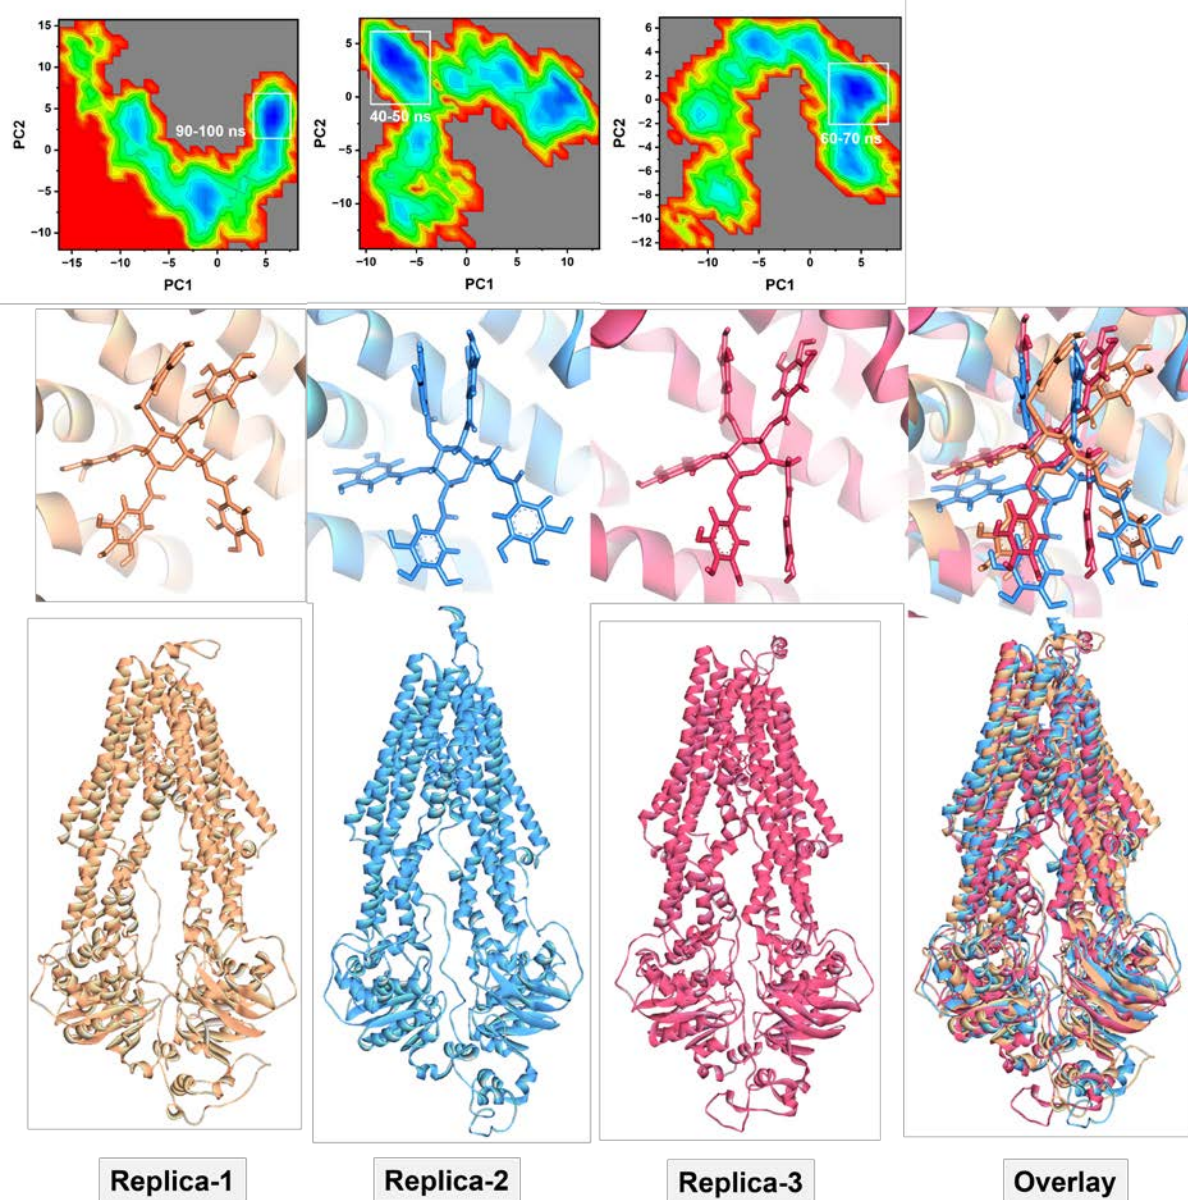

**Supplementary Figure S7.** 3D structures of protein-ligand complex and free energy landscape (FEL) of three replica copies of PGG at substrate binding site of P-gp

### Three replica copies of ATP bound with P-gp at ATP binding site

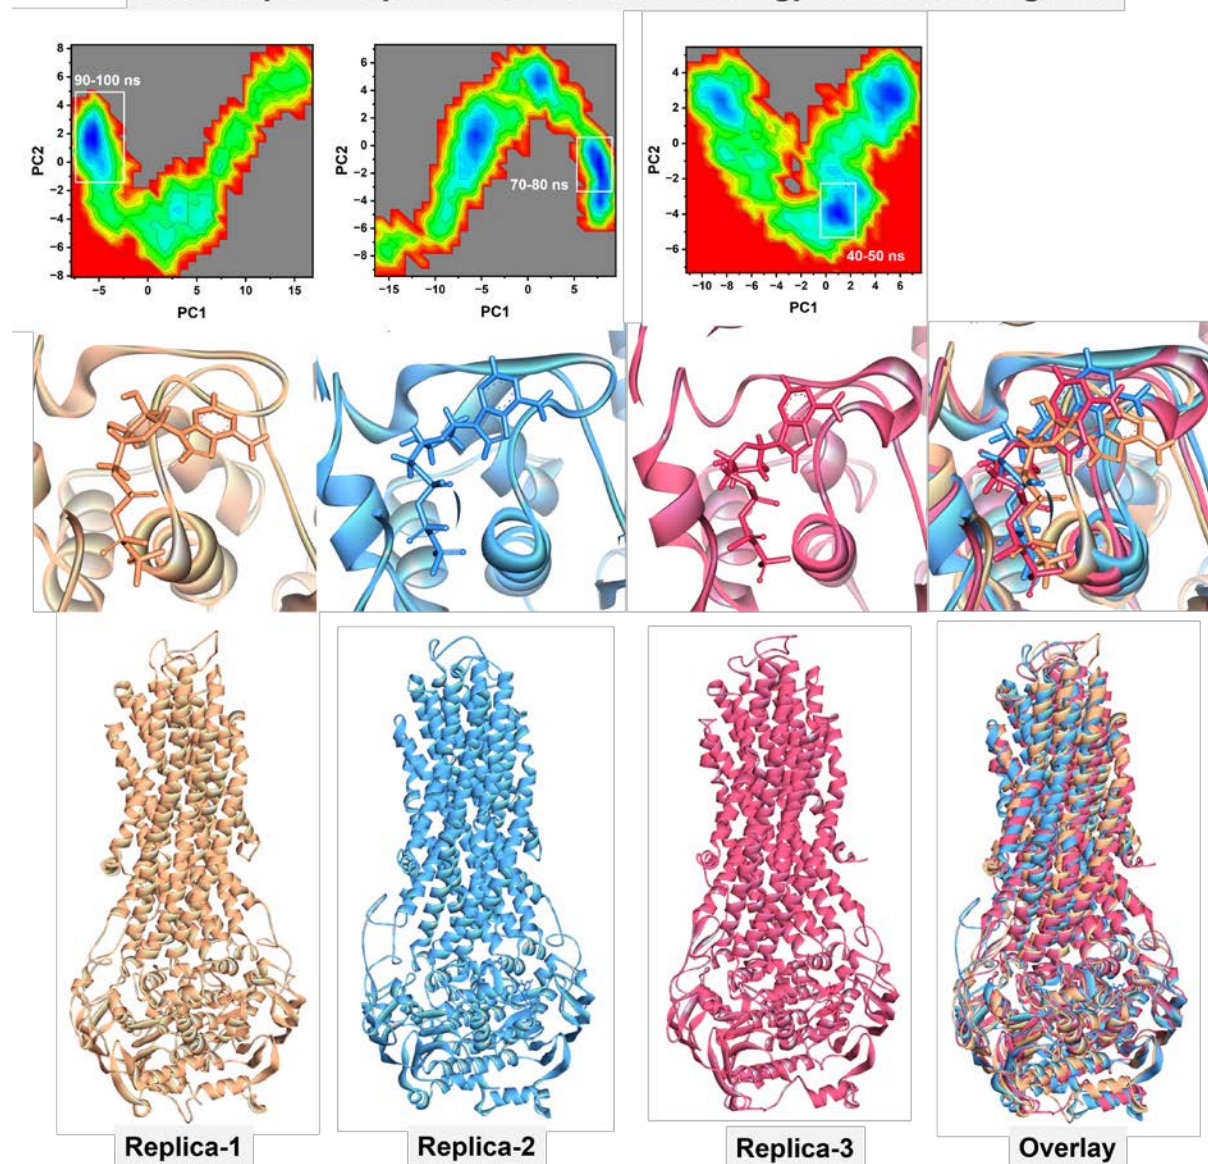

**Supplementary Figure S8.** 3D structures of protein-ligand complex and free energy landscape (FEL) of three replica copies of ATP at ATP binding site of P-gp



### Three replica copies of PGG bound with P-gp at ATP binding site

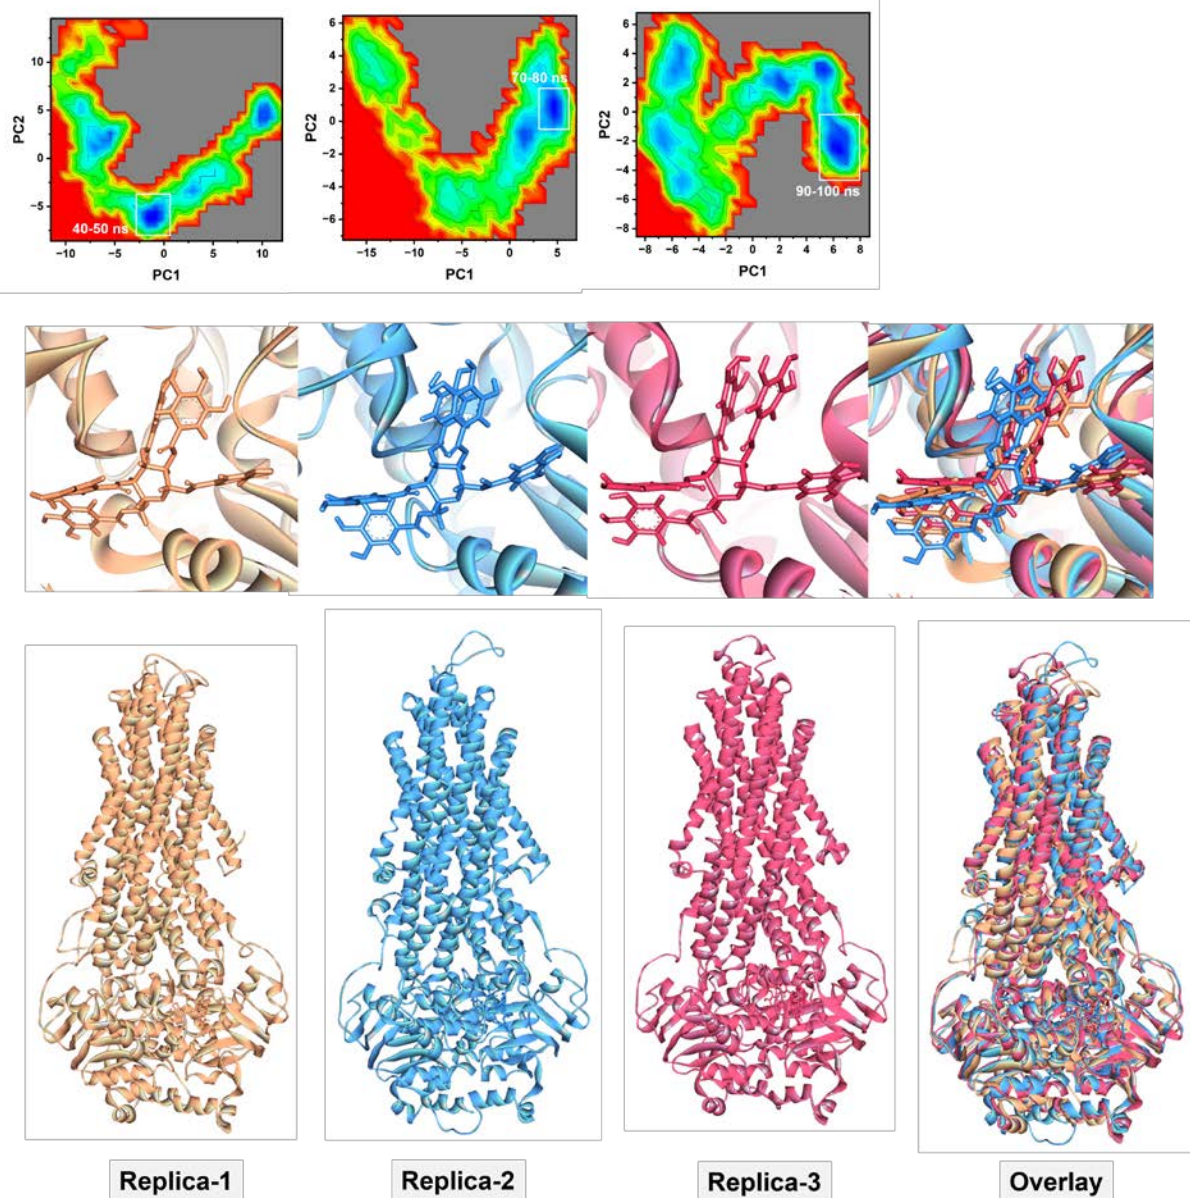

**Supplementary Figure S9.** 3D structures of protein-ligand complex and free energy landscape (FEL) of three replica copies of PGG at ATP binding site of P-gp

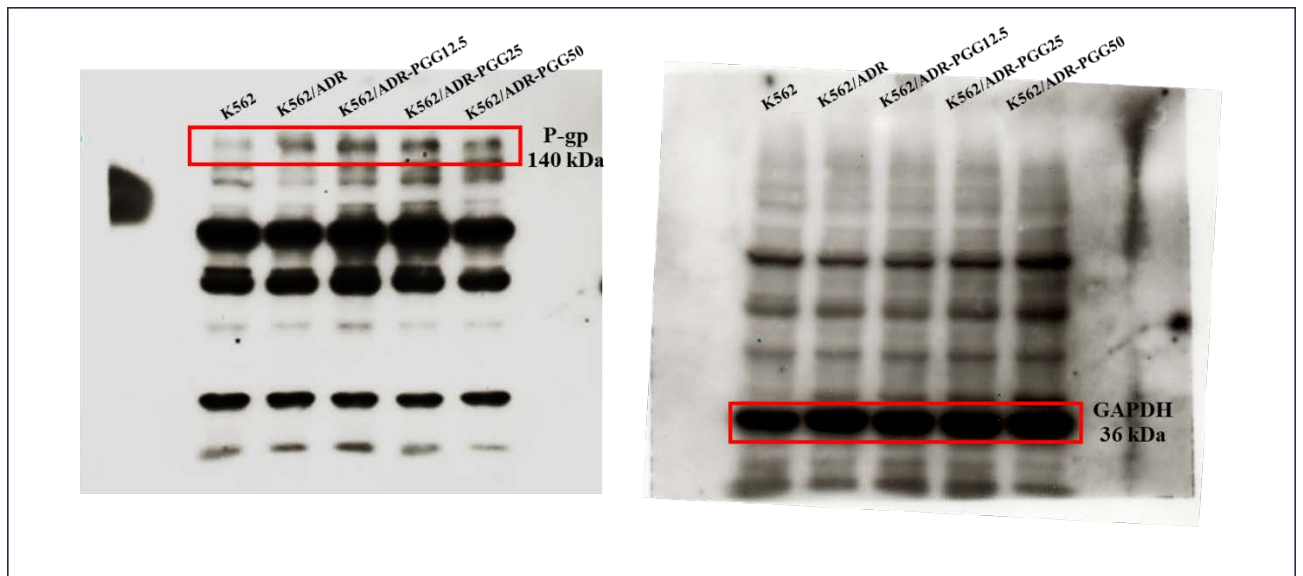

**Supplementary Figure S10.** The uncropped Western blot images corresponding to Figure 3a showing all the bands. Red boxes indicate the samples of interest.
